# Supplementary material
Source: publisher site journal article supplement (https://www.dovepress.com/article/587398)
Supplement: Supplementary file 1 [file 587398_Supplementary%20Tables.docx]

Supplementary Table 1 Specific expression levels in psoriasis (mean ± standard deviation) and statistically significant differences

| Gene | Mean | SD | Control | PsO | P value | Significance |
| --- | --- | --- | --- | --- | --- | --- |
| FOS | 7.94867595342561 | 2.0369550443606 | 7.949 ± 2.037 | NA | 0.0014 | ** |
| FOS | 7.22637023391003 | 1.99559633007783 | NA | 7.226 ± 1.996 | 0.0014 | ** |
| EGR1 | 10.1117886315225 | 0.485917292164471 | 10.112 ± 0.486 | NA | 0.0592 | ns |
| EGR1 | 10.223869616782 | 0.45979451327287 | NA | 10.224 ± 0.46 | 0.0592 | ns |
| SOCS3 | 4.19186828775087 | 0.316125271675824 | 4.192 ± 0.316 | NA | 0 | *** |
| SOCS3 | 4.66824530318339 | 0.45518130721932 | NA | 4.668 ± 0.455 | 0 | *** |
| PTGS2 | 4.22567992878893 | 0.861214490119671 | 4.226 ± 0.861 | NA | 6e-04 | *** |
| PTGS2 | 4.64209303695502 | 0.729697851139264 | NA | 4.642 ± 0.73 | 6e-04 | *** |
| JUN | 9.91838940439446 | 0.419911533959963 | 9.918 ± 0.42 | NA | 0.0021 | ** |
| JUN | 9.72708312297578 | 0.437124054042833 | NA | 9.727 ± 0.437 | 0.0021 | ** |
| IL6 | 2.23125869771626 | 0.395865289921891 | 2.231 ± 0.396 | NA | 0 | *** |
| IL6 | 2.83689686958478 | 1.65874318065414 | NA | 2.837 ± 1.659 | 0 | *** |
| NR4A1 | 2.26078839086505 | 0.120184921909689 | 2.261 ± 0.12 | NA | 0.0055 | ** |
| NR4A1 | 2.25808048553633 | 0.166172847221128 | NA | 2.258 ± 0.166 | 0.0055 | ** |
| ZFP36 | 11.1429266388581 | 0.553712464816841 | 11.143 ± 0.554 | NA | 0 | *** |
| ZFP36 | 11.9125318853979 | 0.434300132878547 | NA | 11.913 ± 0.434 | 0 | *** |
| MYC | 9.44890136100346 | 1.08520408429465 | 9.449 ± 1.085 | NA | 0 | *** |
| MYC | 10.3428837644291 | 0.611571772664584 | NA | 10.343 ± 0.612 | 0 | *** |
| FOSB | 7.48810320456747 | 2.22320456348179 | 7.488 ± 2.223 | NA | 0.0024 | ** |
| FOSB | 8.24085829885813 | 1.76976075091252 | NA | 8.241 ± 1.77 | 0.0024 | ** |
| JUNB | 10.9275953551211 | 0.33153384636019 | 10.928 ± 0.332 | NA | 0 | *** |
| JUNB | 11.1735700786505 | 0.286968930340907 | NA | 11.174 ± 0.287 | 0 | *** |
| GADD45B | 7.0558449900346 | 0.691568558099187 | 7.056 ± 0.692 | NA | 0.0231 | * |
| GADD45B | 7.27730983858132 | 0.501602923128576 | NA | 7.277 ± 0.502 | 0.0231 | * |

Supplementary Table 2 Specific expression levels (mean ± standard deviation) and statistically significant differences in non-alcoholic fatty liver disease

| Gene | Mean | SD | Control | NASH | P value | Significance |
| --- | --- | --- | --- | --- | --- | --- |
| FOS | 5.84413856819865 | 0.88297039127487 | 5.844 ± 0.883 | NA | 3e-04 | *** |
| FOS | 4.47065202424568 | 0.429208504102505 | NA | 4.471 ± 0.429 | 3e-04 | *** |
| EGR1 | 8.31405867036832 | 0.615285938150761 | 8.314 ± 0.615 | NA | 0.002 | ** |
| EGR1 | 6.32964522522094 | 1.29045201877742 | NA | 6.33 ± 1.29 | 0.002 | ** |
| SOCS3 | 4.99718979029868 | 0.357686413930267 | 4.997 ± 0.358 | NA | 0.0036 | ** |
| SOCS3 | 4.51399219183258 | 0.506072209953479 | NA | 4.514 ± 0.506 | 0.0036 | ** |
| PTGS2 | 3.41918799489124 | 0.337359826184146 | 3.419 ± 0.337 | NA | 0.0563 | ns |
| PTGS2 | 3.21395105204567 | 0.128451254241759 | NA | 3.214 ± 0.128 | 0.0563 | ns |
| JUN | 6.52014688101772 | 0.733310730006416 | 6.52 ± 0.733 | NA | 9e-04 | *** |
| JUN | 5.3977772747855 | 0.518558959707499 | NA | 5.398 ± 0.519 | 9e-04 | *** |
| IL6 | 4.09780558245771 | 0.205129026083106 | 4.098 ± 0.205 | NA | 0.0677 | ns |
| IL6 | 3.92672502898967 | 0.212450133575864 | NA | 3.927 ± 0.212 | 0.0677 | ns |
| NR4A1 | 5.94612728770809 | 0.578174610817259 | 5.946 ± 0.578 | NA | 3e-04 | *** |
| NR4A1 | 4.80191448754684 | 0.488327209140502 | NA | 4.802 ± 0.488 | 3e-04 | *** |
| ZFP36 | 7.09911749159458 | 0.743602714434453 | 7.099 ± 0.744 | NA | 0.0127 | * |
| ZFP36 | 6.16392011160026 | 0.956005773726458 | NA | 6.164 ± 0.956 | 0.0127 | * |
| MYC | 6.16153466378706 | 0.832382476574401 | 6.162 ± 0.832 | NA | 0.1854 | ns |
| MYC | 5.70579996934527 | 0.907323550371146 | NA | 5.706 ± 0.907 | 0.1854 | ns |
| FOSB | 6.51169472306794 | 1.41893037544163 | 6.512 ± 1.419 | NA | 0.0063 | ** |
| FOSB | 5.38751170276397 | 0.813033324032052 | NA | 5.388 ± 0.813 | 0.0063 | ** |
| JUNB | 8.39686023507229 | 0.862963318727793 | 8.397 ± 0.863 | NA | 0.001 | ** |
| JUNB | 6.87695051811316 | 0.816654554304525 | NA | 6.877 ± 0.817 | 0.001 | ** |
| GADD45B | 8.45877285207766 | 0.667922632839052 | 8.459 ± 0.668 | NA | 0.0018 | ** |
| GADD45B | 6.86148240172588 | 0.92388644083358 | NA | 6.861 ± 0.924 | 0.0018 | ** |
